# Supplementary material
Source: publisher figshare collection journal article supplement (https://frontiersin.figshare.com/ndownloader/files/13649810)
Supplement: Supplementary file 1 [file 13649810]

Archive with 8 entries (8 files):
- 3DOpenPoreMaterialsAnalyzer.py
- ANN3.net
- ANN3E.net
- ANN3gi.net
- ANN3sy.net
- FFNN_Lib.py
- GNU GENERAL PUBLIC LICENSE-V3.txt
- Readme.txt
