# Supplementary material
Source: publisher figshare collection journal article supplement (https://frontiersin.figshare.com/ndownloader/files/13649810)
Supplement: Supplementary file 1 [file 13649810 › ANN3.net]

// This code is written by Norbert Huber
// Institute of Materials Research, Materials Mechanics
// Helmholtz-Zentrum Geesthacht (HZG)
// Date: 03.08.2018
//
// LICENSE
// 
// This file is part of 3DOpenPoreMaterialsAnalyzer.
//
// 3DOpenPoreMaterialsAnalyzer is free software: you can redistribute it and/or modify
// it under the terms of the GNU General Public License as published by
// Norbert Huber, Helmholtz-Zentrum Geesthacht, either version 3 of the License, or
// (at your option) any later version.
// 
// 3DOpenPoreMaterialsAnalyzer is distributed in the hope that it will be useful,
// but WITHOUT ANY WARRANTY; without even the implied warranty of
// MERCHANTABILITY or FITNESS FOR A PARTICULAR PURPOSE.  See the
// GNU General Public License for more details.
// 
// You should have received a copy of the GNU General Public License
// along with 3DOpenPoreMaterialsAnalyzer.
// If not, see <http://www.gnu.org/licenses/>.
//
//ANN3: calculation of average coordination number from statistics of junctions N_J, J=3...8
//
//No. Epochs 20001
//SSET = 3.772513e-002 SSEV = 9.224028e-003
//MSET = 7.158469e-005 MSEV = 1.590350e-004

// Number of layers
L = 3

// Number of neurons in each layer
NL = [ 6, 6, 1 ]

//Synaptic weights of trained ANN
W = [ -28.436557, 9.880791, -9.933425, -6.723883, -9.162054, 0.598414, 0.249112, -23.928833, 0.186437, 22.288088, -4.661555, -10.755911, -19.553755, -2.210957, 19.641365, -9.415741, -5.321259, 3.575621, 4.170563, -4.179507, 0.818828, 0.170266, 3.811695, 2.261227, -0.436240, 1.604129, 0.667365, 0.692385, -6.999878, -0.119922, 4.035845, 1.480925, 0.579442, 4.165777, -0.193415, 0.951992, -1.654654, -4.736926, 1.267318, 1.773686, 2.006459, -0.443473, 0.883370, -1.046753, -0.381425, -0.303473, 1.176025, 1.048764, 0.709206]

//Min-Max-Values for scaling of inputs to training range
min_in = [ 0.000000, 0.000000, 0.000000, 0.000000, 0.000000, 0.000000 ]
max_in = [ 1.000000, 1.000000, 0.411305, 1.000000, 0.393266, 1.000000 ]

//Min-Max-Values for scaling of outputs to training range
min_out = [ 0.782936 ]
max_out = [8.000000 ]
