# Supplementary material
Source: publisher figshare collection journal article supplement (https://frontiersin.figshare.com/ndownloader/files/13649810)
Supplement: Supplementary file 1 [file 13649810 › ANN3E.net]

// This code is written by Norbert Huber
// Institute of Materials Research, Materials Mechanics
// Helmholtz-Zentrum Geesthacht (HZG)
// Date: 03.08.2018
//
// LICENSE
// 
// This file is part of 3DOpenPoreMaterialsAnalyzer.
//
// 3DOpenPoreMaterialsAnalyzer is free software: you can redistribute it and/or modify
// it under the terms of the GNU General Public License as published by
// Norbert Huber, Helmholtz-Zentrum Geesthacht, either version 3 of the License, or
// (at your option) any later version.
// 
// 3DOpenPoreMaterialsAnalyzer is distributed in the hope that it will be useful,
// but WITHOUT ANY WARRANTY; without even the implied warranty of
// MERCHANTABILITY or FITNESS FOR A PARTICULAR PURPOSE.  See the
// GNU General Public License for more details.
// 
// You should have received a copy of the GNU General Public License
// along with 3DOpenPoreMaterialsAnalyzer.
// If not, see <http://www.gnu.org/licenses/>.
//
//ANN3E: correction of Young's modulus relative to master curve from statistics of junctions N_J, J=3...8
//
//No. Epochs 20001
//SSET = 6.516714e-001 SSEV = 6.438413e-002
//MSET = 1.238919e-003 MSEV = 1.110071e-003

// Number of layers
L = 3

// Number of neurons in each layer
NL = [ 6, 6, 1 ]

//Synaptic weights of trained ANN
W = [ -26.864018, -12.517275, 29.559083, -27.781589, -3.809311, -0.017453, 0.432729, -18.823939, 53.448561, -17.850356, -14.029473, -3.662452, -31.106458, 0.342512, -44.325343, -82.536199, -11.312842, -2.309081, 33.706120, -0.088625, -0.418424, -22.687781, 22.961374, 7.794407, 15.941448, 11.214096, 0.644746, 0.898344, 7.942630, 5.304457, -9.277987, 1.156518, 4.451892, -3.360626, -0.399358, -14.614810, -30.162750, -19.324072, -11.629683, 28.229030, -6.394793, 0.397001, 1.126846, 0.562284, 1.405574, 1.081494, 0.699398, 1.410027, 3.858297 ]

//Min-Max-Values for scaling of inputs to training range
min_in = [ 0.000000, 0.000000, 0.000000, 0.000000, 0.000000, 0.000000 ]
max_in = [ 1.000000, 1.000000, 0.411305, 1.000000, 0.393266, 1.000000 ]

//Min-Max-Values for scaling of outputs to training range
min_out = [-0.024979 ]
max_out = [ 0.019176 ]
