# Supplementary material
Source: publisher figshare collection journal article supplement (https://frontiersin.figshare.com/ndownloader/files/13649810)
Supplement: Supplementary file 1 [file 13649810 › ANN3gi.net]

// This code is written by Norbert Huber
// Institute of Materials Research, Materials Mechanics
// Helmholtz-Zentrum Geesthacht (HZG)
// Date: 03.08.2018
//
// LICENSE
// 
// This file is part of 3DOpenPoreMaterialsAnalyzer.
//
// 3DOpenPoreMaterialsAnalyzer is free software: you can redistribute it and/or modify
// it under the terms of the GNU General Public License as published by
// Norbert Huber, Helmholtz-Zentrum Geesthacht, either version 3 of the License, or
// (at your option) any later version.
// 
// 3DOpenPoreMaterialsAnalyzer is distributed in the hope that it will be useful,
// but WITHOUT ANY WARRANTY; without even the implied warranty of
// MERCHANTABILITY or FITNESS FOR A PARTICULAR PURPOSE.  See the
// GNU General Public License for more details.
// 
// You should have received a copy of the GNU General Public License
// along with 3DOpenPoreMaterialsAnalyzer.
// If not, see <http://www.gnu.org/licenses/>.
//
//ANN3gi: calculation of average coordination number 
// from statistics of junctions N_J, J=3...8 
// and estimated scaled genus density of core structure
//
//No. Epochs 20001
//SSET = 7.371089e-003 SSEV = 8.718475e-004
//MSET = 1.742574e-005 MSEV = 1.895321e-005

// Number of layers
L = 3

// Number of neurons in each layer
NL = [ 7, 6, 1 ]

//Synaptic weights of trained ANN
W = [ -3.056487, 0.377424, -5.151799, -0.063398, 0.308984, -0.222586, -1.314225, 0.593504, 6.284496, -2.424855, -10.407061, 1.627819, 7.220825, 6.572533, 8.514942, 1.832517, 8.958370, 6.840095, 2.357472, 5.143004, 0.926931, 0.731983, 27.849744, 1.708077, -6.682251, 6.784585, -3.305991, -0.899285, -6.350018, 2.260899, 1.464601, 0.948630, 6.544479, 1.369929, -3.475132, 0.092236, -2.906477, -1.698219, -1.055651, -0.097948, -3.493664, -11.074890, -0.569402, 1.038846, 6.018760, 3.170155, 0.277043, 0.961776, -0.175931, 0.450270, 0.817821, 0.730462, -0.703476, 0.689586, 0.514640 ]

//Min-Max-Values for scaling of inputs to training range
min_in = [ 0.000000, 0.000000, 0.000000, 0.000000, 0.000000, 0.000000, -5.894194 ]
max_in = [ 1.000000, 1.000000, 0.411305, 1.000000, 0.393266, 1.000000, 3.001457 ]

//Min-Max-Values for scaling of outputs to training range
min_out = [ 0.782936 ]
max_out = [ 8.000000 ]
