# Supplementary material
Source: publisher figshare collection journal article supplement (https://frontiersin.figshare.com/ndownloader/files/13649810)
Supplement: Supplementary file 1 [file 13649810 › ANN3sy.net]

// This code is written by Norbert Huber
// Institute of Materials Research, Materials Mechanics
// Helmholtz-Zentrum Geesthacht (HZG)
// Date: 03.08.2018
//
// LICENSE
// 
// This file is part of 3DOpenPoreMaterialsAnalyzer.
//
// 3DOpenPoreMaterialsAnalyzer is free software: you can redistribute it and/or modify
// it under the terms of the GNU General Public License as published by
// Norbert Huber, Helmholtz-Zentrum Geesthacht, either version 3 of the License, or
// (at your option) any later version.
// 
// 3DOpenPoreMaterialsAnalyzer is distributed in the hope that it will be useful,
// but WITHOUT ANY WARRANTY; without even the implied warranty of
// MERCHANTABILITY or FITNESS FOR A PARTICULAR PURPOSE.  See the
// GNU General Public License for more details.
// 
// You should have received a copy of the GNU General Public License
// along with 3DOpenPoreMaterialsAnalyzer.
// If not, see <http://www.gnu.org/licenses/>.
//
//ANN3E: correction of yield strength relative to master curve from statistics of junctions N_J, J=3...8
//
//No. Epochs 30001
//SSET = 2.413443e-001 SSEV = 2.545273e-002
//MSET = 5.223903e-004 MSEV = 4.990731e-004

// Number of layers
L = 3

// Number of neurons in each layer
NL = [ 6, 6, 1 ]

//Synaptic weights of trained ANN
W = [ -8.329557, -33.210949, 28.021301, -0.841533, -12.919448, -1.441551, -0.416683, -46.677730, -33.897222, -18.856113, -5.109222, 19.307018, 0.195381, 0.441460, 13.539780, -11.937736, 3.660259, 0.164024, 1.781179, -2.251409, 0.365525, -34.580162, -10.703836, -29.428965, 5.955806, 0.348399, 0.234297, 0.373877, -23.896417, -24.088527, 21.991822, -4.163893, -10.866882, 0.143994, 0.221734, 15.056124, 22.099468, 13.936136, 12.234328, -22.180410, 8.136693, -0.131006, 0.662628, -1.933760, -0.769001, 1.000522, 0.679710, 3.774361, 0.732976 ]

//Min-Max-Values for scaling of inputs to training range
min_in = [ 0.000000, 0.000000, 0.000000, 0.000000, 0.000000, 0.000000 ]
max_in = [ 1.000000, 1.000000, 0.411305, 1.000000, 0.393266, 1.000000 ]

//Min-Max-Values for scaling of outputs to training range
min_out = [-0.031331 ]
max_out = [ 0.064014 ]
