# Supplementary material
Source: publisher figshare collection journal article supplement (https://frontiersin.figshare.com/ndownloader/files/13649810)
Supplement: Supplementary file 1 [file 13649810 › Readme.txt]

This code is written by Norbert Huber
Institute of Materials Research, Materials Mechanics
Helmholtz-Zentrum Geesthacht (HZG)
Date: 03.08.2018

For running the OpenPoreMaterialsAnalyzer copy all files from the Zip folder in a common folder
OpenPoreMaterialsAnalyzer.py 
Main
A number of selected examples from the supplementary data are computed and results are printed to the screen. 

FFNN_Lib.py: 
Library for setting up ANNs and operating them, included by OpenPoreMaterialsAnalyzer.py

ANN3.net: 
Neural network definitions for calculation of average coordination number 
from statistics of junctions

ANN3gi.net: 
Neural network definitions for calculation of average coordination number 
from statistics of junctions and genus of the core structure

ANN3E.net: 
Neural network definitions for correction of macroscopic Young's modulus

ANN3sy.net: 
Neural network definitions for correction of macroscopic yield strength

Referencing of the DOI number for the Supplementary Material is required for
a) publications using the code or modified versions of it, 
b) publications that make use of the supplementary data 
provided with this publication.
https://www.frontiersin.org/articles/10.3389/fmats.2018.00069/full#supplementary-material


LICENSE

This file is part of 3DOpenPoreMaterialsAnalyzer.

3DOpenPoreMaterialsAnalyzer is free software: you can redistribute it and/or modify
it under the terms of the GNU General Public License as published by
Norbert Huber, Helmholtz-Zentrum Geesthacht, either version 3 of the License, or
(at your option) any later version.

3DOpenPoreMaterialsAnalyzer is distributed in the hope that it will be useful,
but WITHOUT ANY WARRANTY; without even the implied warranty of
MERCHANTABILITY or FITNESS FOR A PARTICULAR PURPOSE.  See the
GNU General Public License for more details.

You should have received a copy of the GNU General Public License
along with 3DOpenPoreMaterialsAnalyzer.  
If not, see <http://www.gnu.org/licenses/>.
